# Supplementary material for: 3 Months without the car in Bielefeld, Germany– a mixed-method study exploring individual motivation to participate in a municipal intervention
Source: Springer Nature journal article supplement (doi:10.1186/s12889-024-18266-7), 2024-03-11
Supplement: MOESM1 [file 26840550]

# Baseline questionnaire “3 months without the car”

1. In which district/quarter of Bielefeld do you live?

- Mitte
- Heepen
- Stieghorst
- Brackwede
- Gadderbaum
- Dornberg
- Senne
- Sennestadt
- Jöllenbeck
- Schildesche

2. Habits in mobility

First of all we want to get to know more about your mobility habits.

How many ways did you do on Tuesday, 29<sup>th</sup> of March 2023? One way is defined as moving from one place to another by foot or means of transport. Outward and return journey count as two ways.

Example: You go by bike to the daycare (way 1), then to the bakery (way 2), next is your workp place (way 3), back to the day care (way 4) and back home (way 5).

Please type your answer here: [number]\_\_\_\_\_

If you did not leave the house please type 0.

3. [If answer in 2. was > 0] How many of those ways were connected ways?

Example: You go to work and take your children to the daycare centre on the way.

Please type your answer here: [number]\_\_\_\_\_

4. [If answer in 2. was 0] You stated that you did not leave the house on the 29<sup>th</sup> of March 2023. Would you please explain shortly?

Please type your answer here: [text]\_\_\_\_\_

5. Did you use different means of transport this day?

- Yes
- No

6. [If answer in 5. was ‘Yes’] Which means of transport did you use?

- Car

- Bike/E-Bike
- Bus
- Tram
- Train
- Scooter/E-Scooter
- Roller/E-Roller
- Others: [text]\_\_\_\_\_

7. Does your household currently have transport alternatives to the car?

- Yes
- No

8. [If answer in 7. was 'Yes'] Which alternatives does your household currently have?

- Bike
- E-Bike
- Cargo Bike
- E-Cargo Bike
- Scooter
- E-Scooter
- Roller
- E-Roller
- Others:  
[text]\_\_\_\_\_

9. Do you currently have season ticket for public transport (bus, train, tram)?

- Yes
- No

10. [If answer in 9. was 'Yes'] Which season ticket for public transport do you have?

- Annual ticket
- Monthly or weekly ticket
- Tryout ticket for 3 months
- BahnCard (*discount for train tickets*)
- Others:  
[text]\_\_\_\_\_

11. Do you currently have a membership for renting cars, e-scooter, etc.?

- Yes
- No

12. [If answer in 11. was 'Yes'] Which membership do you have?

- Car-Sharing membership
- E-Scooter membership
- Others:  
[text]\_\_\_\_\_

13. Please choose now a route (e.g., to work, to your place of education, to relatives) that you travel regularly and several times a week.

Please write down your chosen route here: [text]\_\_\_\_\_

When answering the following questions, please refer to the journey just indicated.

14. Which means of transportation do you currently use for the chosen journey?

Please indicate for the following means of transportation how often do you currently use them for the chosen journey (1 “very often” to 6 “never”).

1 2 3 4 5 6

car  
bike/e-bike/rental bike  
cargo bike/e-cargo bike/rental e-cargo bike  
scooter/e-scooter/ rental e-scooter  
Roller/rental e-roller  
bus  
tram  
car-sharing  
train  
collective call cab  
on-demand bus

15. Are there other means of transport that you use very often or often for the chosen journey?

[text]\_\_\_\_\_

16. How important are the following criteria when choosing the means of transportation for your chosen journey?

Please indicate for the following criteria how important do you think they are for choosing the means of transportation for your chosen journey (1 “very important” to 6 “not important at all”).

1 2 3 4 5 6

flexibility  
promptness  
punctuality  
reliability  
traffic safety  
Protection against crime (assaults, theft)  
costs (e.g. ticket price)  
relaxation  
environmental compatibility  
convenience

transportation of heavy or unwieldy objects  
reachability  
transfer frequency  
schedules  
operating hours  
comfort

17. Are there other criteria that are very important or important to you which were not mentioned in the question above?

[text]\_\_\_\_\_

18. How satisfied are you with the following characteristics of public transportation?

Please indicate how satisfied you are with the following characteristics of public transport (1 "very satisfied" to 6 "not satisfied at all").

|                                             | 1 | 2 | 3 | 4 | 5 | 6 |
|---------------------------------------------|---|---|---|---|---|---|
| flexibility                                 |   |   |   |   |   |   |
| promptness                                  |   |   |   |   |   |   |
| punctuality                                 |   |   |   |   |   |   |
| reliability                                 |   |   |   |   |   |   |
| traffic safety                              |   |   |   |   |   |   |
| protection against crime (assaults, theft)  |   |   |   |   |   |   |
| costs (e.g. ticket price)                   |   |   |   |   |   |   |
| relaxation                                  |   |   |   |   |   |   |
| environmental compatibility                 |   |   |   |   |   |   |
| convenience                                 |   |   |   |   |   |   |
| transportation of heavy or unwieldy objects |   |   |   |   |   |   |
| reachability                                |   |   |   |   |   |   |
| transfer frequency                          |   |   |   |   |   |   |
| schedules                                   |   |   |   |   |   |   |
| operating hours                             |   |   |   |   |   |   |
| comfort                                     |   |   |   |   |   |   |
| suitability for everyday use                |   |   |   |   |   |   |

19. Which characteristics of public transport are additionally important?

[text]\_\_\_\_\_

20. How satisfied are you with the following characteristics of renting memberships?

Please indicate how satisfied you are with the following characteristics of renting memberships (1 "very satisfied" to 6 "not satisfied at all").

|              | 1 | 2 | 3 | 4 | 5 | 6 |
|--------------|---|---|---|---|---|---|
| reachability |   |   |   |   |   |   |
| reliability  |   |   |   |   |   |   |
| availability |   |   |   |   |   |   |

functionality  
selection option  
comfort  
costs (e.g. ticket price)  
cleanliness  
service

21. Which characteristics of renting memberships are additionally important?

[text] \_\_\_\_\_

22. Do children below the age of 12 years live in your household?

- Yes
- No

23. [If answer in 22. was 'Yes'] How many children below the age of 12 years live in your household?

[number] \_\_\_\_\_

24. How do you bring your children to, e.g. daycare centre, school, friends, leisure activities?

Please indicate for the following means of transportation how often do you currently use them to bring your children to, e.g. daycare centre, school, friends, leisure activities (1 "very often" to 6 "never").

1 2 3 4 5 6

car  
bike/e-bike/rental bike  
cargo bike/e-cargo bike/rental e-cargo bike  
scooter/e-scooter/ rental e-scooter  
Roller/rental e-roller  
bus  
tram  
car-sharing  
train  
collective call cab  
on-demand bus

25. Are there other means of transport that you use very often or often to bring your children to, e.g. daycare centre, school, friends, leisure activities?

[text] \_\_\_\_\_

26. What is generally important to you when using public transport (bus, tram) in Bielefeld?

Please indicate for the following characteristics how important do you think they are for the public transport in Bielefeld (1 "very important" to 6 "not important at all").

1 2 3 4 5 6

many park-and-ride spaces  
close intervals of departure times  
expansion of the tram routes  
low prices  
clean buses and trams  
clean stops and platforms  
lots of security  
reliability

27. Are there additional characteristics that you think are important for the public transport in Bielefeld that were not mentioned in the question above?

[text]\_\_\_\_\_

28. How important are the following characteristics for you when cycling?

Please indicate for the following characteristics of cycling how important they are to you (1 "very important" to 6 "not important at all").

1 2 3 4 5 6

many cycle paths  
safe cycle paths  
bike-friendly traffic lights  
plenty of parking options for the bike  
safe parking options for the bike  
consideration by car drivers  
consideration by other cyclists

29. Are there additional characteristics that are important for you when cycling that were not mentioned in the question above?

[text]\_\_\_\_\_

Well-being and health

In the following section we want to know more about your well-being and health.

30. Please indicate for each of the five statements which is closest to how you have been feeling over the last two weeks.

In the last 2 weeks...

| All of the time | Most of the time | More than half the time | Less than half the time | Some of the time | At no time |
|-----------------|------------------|-------------------------|-------------------------|------------------|------------|
|-----------------|------------------|-------------------------|-------------------------|------------------|------------|

I have felt cheerful in good spirits.

I have felt calm and relaxed.

I have felt active and vigorous.

I woke up feeling fresh and rested.

My daily life has been filled with things that interest me.

31. The following question is regarding your health. Please indicate which statement represents best your general health.

- Very good
- Good
- Mediocre
- Bad
- Very bad

32. The questions in this scale ask you about your feelings and thoughts during the last month. In each case, you will be asked to indicate how often you felt or thought a certain way.

If you think about the last month...

|                                                                                                   | Never | Almost never | Sometimes | Quite often | Very often |
|---------------------------------------------------------------------------------------------------|-------|--------------|-----------|-------------|------------|
| ... how often have you been upset because of something that happened unexpectedly?                |       |              |           |             |            |
| ... how often have you felt that you were unable to control the important things in your life?    |       |              |           |             |            |
| ... how often have you felt nervous and "stressed"?                                               |       |              |           |             |            |
| ... how often have you felt confident about your ability to handle your personal problems?        |       |              |           |             |            |
| ... how often have you felt that things were going your way?                                      |       |              |           |             |            |
| ... how often have you found that you could not cope with all the things that you had to do?      |       |              |           |             |            |
| ... how often have you been able to control irritations in your life?                             |       |              |           |             |            |
| ... how often have you felt that you were on top of things?                                       |       |              |           |             |            |
| ... how often have you been angered because of things that were outside of your control?          |       |              |           |             |            |
| ... how often have you felt difficulties were piling up so high that you could not overcome them? |       |              |           |             |            |

## Nature and environment

In the following section we want to get to know more about you and your relation to nature and the environment.

33. Please choose one of the following pictures which describes best your relation to the natural environment.

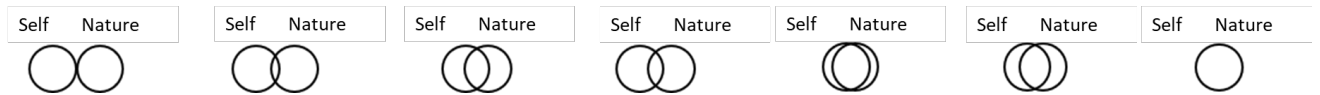

34. To what extent do you agree with the following statements?

Do not agree at all      Do not agree      Partially agree      Do agree      Totally agree

There are natural limits to growth that our industrialised world has long since reached.

In favour of the environment, we should all be prepared to reduce our current standard of living.

It worries me when I think about the environmental conditions in which future generations will probably have to live in.

Climate change also threatens the basis of life here in Germany.

Man-made environmental problems such as deforestation or plastic in the oceans outrage me.

Other things are important for a good life than the environment and nature.

Each and every one of us is responsible for ensuring that we leave following generations an environment worth living in.

The environmental problem is greatly exaggerated by many environmentalists.

I am pleased about initiatives that simply try out sustainable lifestyles (e.g. ecovillages, the SlowFood movement).



We should not consume more resources than can be regrown.

It makes me angry when I see how Germany is missing its climate protection targets.

More environmental protection also means better quality of life and health for everyone.

We need more economic growth in the future, even if this has a negative impact on the environment.

I get annoyed when environmentalists want to tell me how I should live.

We have to find ways to live well independently of economic growth.

35. Please think about your everyday life and indicate how often you do the following actions. Chose from "Never" to "Always".

Never   Rarely   Sometimes   Often   Always

I buy food from certified organic farming.

When shopping, I choose products with an environmental label (e.g. Blue Angel, EU organic label or EU Ecolabel).

I eat meat at the main meals.

For my everyday journeys, I use my bike, public transport or walk.

When buying household appliances, I choose particularly energy-efficient appliances (A+++ or A++ energy efficiency label).

I donate money to environmental or nature conservation groups.

I am actively involved in environmental protection and nature conservation.

36. My household purchases..

- Conventional electricity
- Green electricity

Almost done! Finally, we would like to know something about you personally.

37. Which gender do you feel you belong to?

- Female
- Male
- Diverse

38. Please write your age in years here: [number]\_\_\_\_\_

39. How many persons live in your household?

[number]\_\_\_\_\_

40. What is your highest achieved educational level?

- No degree
- Lower secondary degree
- Higher secondary degree
- A-Levels
- Degree from a university
- Other degree
