# Supplementary material for: 3 Months without the car in Bielefeld, Germany– a mixed-method study exploring individual motivation to participate in a municipal intervention
Source: Springer Nature journal article supplement (doi:10.1186/s12889-024-18266-7), 2024-03-11
Supplement: MOESM2 [file 26840550]

### **Interview guide '3 months without car' (t<sub>0</sub>)**

1. If you think of a normal weekday: what do you have to do on this day?
  - a. Please describe your daily routine.
  - b. How do you travel?
2. What experiences have you had with the means of transport mentioned?
  - a. Why have you chosen this particular mode of transport?
  - b. Why haven't you chosen the bus/train/bike/car sharing?
  - c. In which situations do you use public transport / bike?
  - d. What experiences have you had with public transport so far?
  - e. What challenges do you face when travelling by bike or walking?
  - f. What factors influence your choice of transport at the moment?
3. Why did you decide to take part in the project?
  - a. What do you hope to gain from the participation?
  - b. What challenges do you face? How do you intend to overcome these challenges?
  - c. What do you need for achieving your goals?
